# Supplementary material for: Genomic BCR-ABL1 breakpoint characterization by a multi-strategy approach for “personalized monitoring” of residual disease in chronic myeloid leukemia patients
Source: PubMed Central journal article supplement (PMC5834283; doi:10.18632/oncotarget.23971), 2018-01-05
Supplement: oncotarget-09-10978-s001.pdf [file oncotarget-09-10978-s001.pdf]

## Genomic BCR-ABL1 breakpoint characterization by a multi-strategy approach for “personalized monitoring” of residual disease in chronic myeloid leukemia patients

### SUPPLEMENTARY MATERIALS

**Supplementary Table 1: Sequences of primers used for SS, for ddPCR EG assays and for ddPCR TM assay**

|                           | Name              | Sequence (5'→3')       |
|---------------------------|-------------------|------------------------|
| Nested primers for SS     | BCRex13_seq       | CATTCCGCTGACCATCAATA   |
|                           | BCRint13-14_291F  | ATGCTCTGTGCCTTGGATCT   |
|                           | BCRex14_seq       | GTCCACTCAGCCACTGGATT   |
|                           | BCRint14-15_3F    | AAGTACTGGTTTGGGGAGGA   |
|                           | BCRint14-15_278F  | TCGAGTAATTGCAGGGGTTT   |
|                           | BCRint14-15_764F  | AGCTTGTGCCACTGCATTC    |
|                           | BCRint14-15_1278F | CATCCCCAAACCAAACCTATT  |
|                           | BCRint14-15_1748F | ATTGTAGGGGCTTCCCACAT   |
| Case#1 (EG assay)         | Cs#1F             | CCTTGCCTCCCTGTTACCTT   |
|                           | Cs#1R             | CCCAGGTAGCTGGTACTACA   |
| Case#2 (EG assay)         | Cs#2F             | TAGCCTGTCTCAGATCCTGG   |
|                           | Cs#2R             | GAGGGAGAGGGGGAAGTATT   |
| Case#3 (EG assay)         | Cs#3F             | GCACGGCTTCTGTTCCCTAGT  |
|                           | Cs#3R             | TGCTGCTTCCCCACTTGATT   |
| Case#4 (EG assay)         | Cs#4F             | GGCAAGGACTTTGACAGACA   |
|                           | Cs#4R             | TCCTCACGCATTCTTTCCTG   |
| Case#5 (EG assay)         | Cs#5F             | CTTCGAGTCACTGGTTTGCC   |
|                           | Cs#5R             | TCTCTCTCTCTCAAGAACCT   |
| Case#6 (EG assay)         | Cs#6F             | GGCACCTGTAATCACAACTGC  |
|                           | Cs#6R             | TCAAGTAAAAATGGCAGTCCA  |
| Case#7 (EG assay)         | Cs#7F             | CCTTCTGGGTGTGGAATTGT   |
|                           | Cs#7R             | TTCACTGGATCTGTGCATGA   |
| Case#8 (EG assay)         | Cs#8F             | GGAGTCCCCTTTGCCTTAAC   |
|                           | Cs#8R             | CGCCTGTAGTACCCTCTACT   |
| Case#9 (EG assay)         | Cs#9F             | TGACACTGGCTTACCTTGTG   |
|                           | Cs#9R             | CTACATACAGGCTTGTGCCA   |
| Case#10 (EG assay)        | Cs#10F            | CACAGCATTCCGCTGACCATCA |
|                           | Cs#10R            | CCTGGTGGCTCCAGTTTCTAC  |
| Reference gene (EG assay) | ZP3F              | CATCCTGAGACGTCCGTACA   |
|                           | ZP3R              | CTGACCACATCTTCTGTGTCC  |
| Case#1 (TM assay)         | Cs#1prF           | CATGACATGCAGATTGCACC   |
|                           | Cs#1prR           | CCCAGGTAGCTGGTACTACA   |
|                           | Cs#1probe         | TGCCCCGTGGTCCCCGGGCTT  |
